# Supplementary material
Source: Springer Nature journal article supplement (https://www.springermedizin.de/resource/supplementary/12884_2007_37_MOESM1_ESM.pdf/9459794)

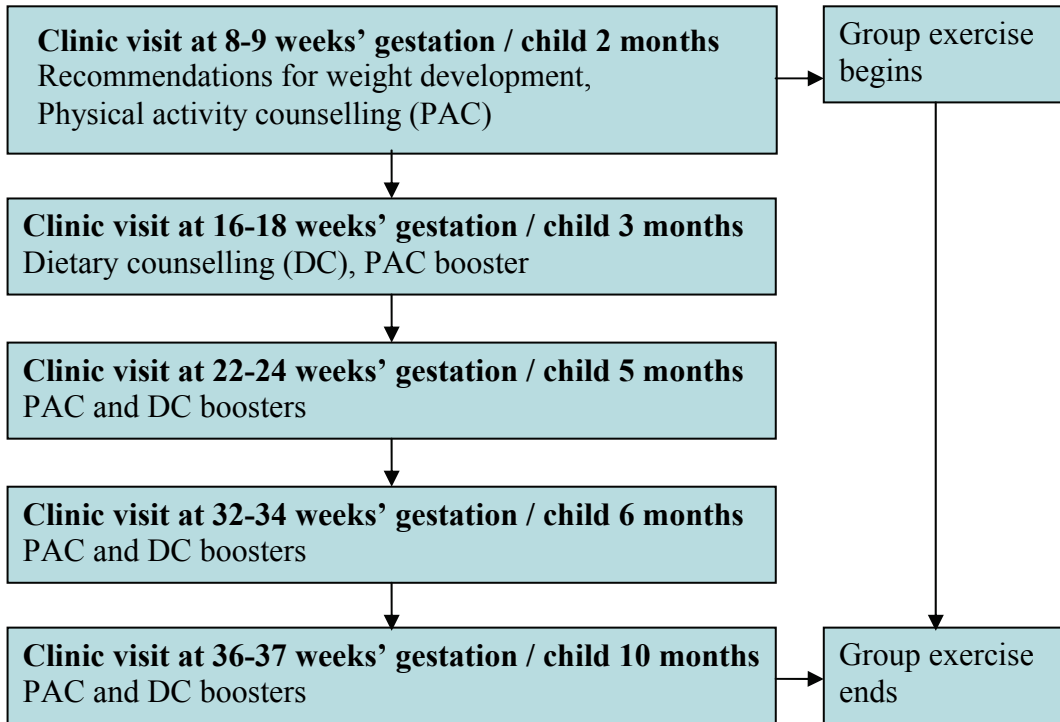

Supplement: MOESM1 [file 9459794]
